# Supplementary material for: Hierarchically structured cellulose aerogels with interconnected MXene networks and their enhanced microwave absorption properties
Source: Royal Society of Chemistry journal article supplement (doi:10.1039/c8tc02900h), 2018-01-01
Supplement: c8tc02900h1.pdf [file c8tc02900h1.pdf]

## Supporting Information

### Hierarchically structured cellulose aerogels with interconnected MXene network and their enhanced microwave absorption properties

Yue Jiang, Xi Xie, Yu Chen, Yujing Liu, Rui Yang \*, Guoxin Sui\*

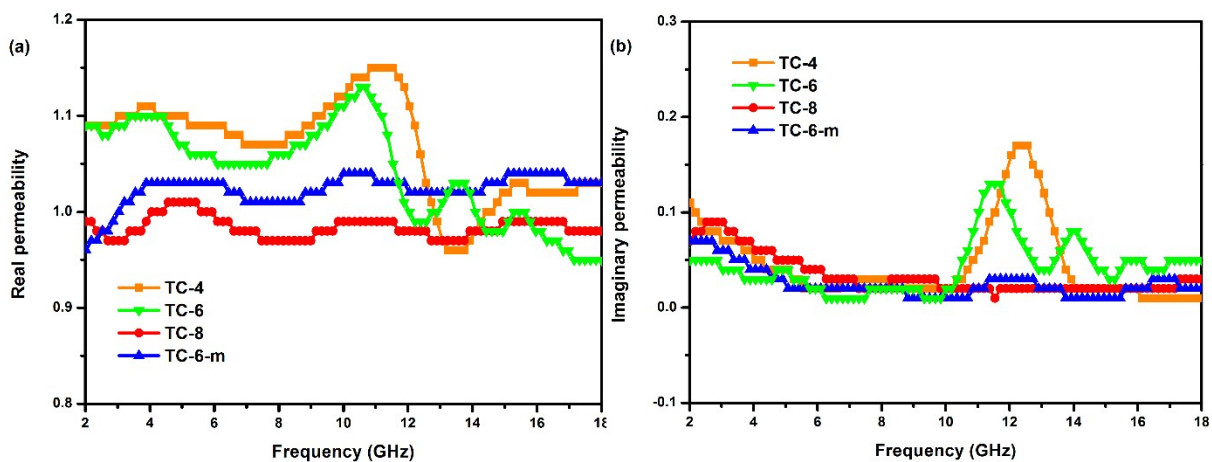

**Figure S1.** (a) Real part and (b) imaginary part of the related permeability spectra of the samples in the range of 2-18 GHz.
